# Supplementary material
Source: PubMed Central journal article supplement (PMC8339328)
Supplement: mmc2.pdf [file mmc2.pdf]

**Supplemental Table 2: Comparisons of survey responses according to current position**

| Variable                                                                                     | Current position                             |                                       | P-value |
|----------------------------------------------------------------------------------------------|----------------------------------------------|---------------------------------------|---------|
|                                                                                              | Associate consultant<br>or Consultant (N=81) | Senior Associate<br>Consultant (N=22) |         |
| I am open to using telemedicine routinely in the future for consultations                    |                                              |                                       | 0.50    |
| Strongly disagree                                                                            | 9 (11.1%)                                    | 1 (4.5%)                              |         |
| Somewhat disagree                                                                            | 12 (14.8%)                                   | 5 (22.7%)                             |         |
| Neither agree not disagree                                                                   | 4 (4.9%)                                     | 2 (9.1%)                              |         |
| Somewhat agree                                                                               | 20 (24.7%)                                   | 7 (31.8%)                             |         |
| Strongly agree                                                                               | 36 (44.4%)                                   | 7 (31.8%)                             |         |
| I am open to using telemedicine routinely in the future for return visits                    |                                              |                                       | 0.90    |
| Strongly disagree                                                                            | 2 (2.5%)                                     | 0 (0.0%)                              |         |
| Somewhat disagree                                                                            | 4 (4.9%)                                     | 1 (4.5%)                              |         |
| Neither agree not disagree                                                                   | 4 (4.9%)                                     | 1 (4.5%)                              |         |
| Somewhat agree                                                                               | 16 (19.8%)                                   | 5 (22.7%)                             |         |
| Strongly agree                                                                               | 55 (67.9%)                                   | 15 (68.2%)                            |         |
| Assuming both are equally appropriate, I prefer to use telemedicine over face-to-face visits |                                              |                                       | 0.82    |
| Strongly disagree                                                                            | 17 (21.3%)                                   | 3 (13.6%)                             |         |
| Somewhat disagree                                                                            | 11 (13.8%)                                   | 5 (22.7%)                             |         |
| Neither agree not disagree                                                                   | 19 (23.8%)                                   | 4 (18.2%)                             |         |
| Somewhat agree                                                                               | 20 (25.0%)                                   | 7 (31.8%)                             |         |
| Strongly agree                                                                               | 13 (16.3%)                                   | 3 (13.6%)                             |         |
| What role has telemedicine played in your experience of burnout                              |                                              |                                       | 0.61    |
| Greatly contributed to burnout                                                               | 2 (2.6%)                                     | 0 (0.0%)                              |         |
| Contributed to burnout                                                                       | 7 (9.2%)                                     | 2 (11.1%)                             |         |
| Neither contributed to or improved burnout                                                   | 43 (56.6%)                                   | 12 (66.7%)                            |         |
| Alleviated burnout symptoms                                                                  | 20 (26.3%)                                   | 3 (16.7%)                             |         |
| Greatly alleviated burnout symptoms                                                          | 4 (5.3%)                                     | 1 (5.6%)                              |         |
| Overall, my work-life balance has been improved with telemedicine                            |                                              |                                       | 0.62    |
| Strongly disagree                                                                            | 9 (11.1%)                                    | 1 (4.8%)                              |         |
| Somewhat disagree                                                                            | 10 (12.3%)                                   | 2 (9.5%)                              |         |
| Neither agree nor disagree                                                                   | 32 (39.5%)                                   | 11 (52.4%)                            |         |
| Somewhat agree                                                                               | 21 (25.9%)                                   | 3 (14.3%)                             |         |
| Strongly agree                                                                               | 9 (11.1%)                                    | 4 (19.0%)                             |         |

P-values result from a Wilcoxon rank sum test.

**Supplemental Table 3: Comparisons of survey responses according to years in practice following residency**

| Variable                                                                                     | Years in practice following residency |                       |                     | P-value |
|----------------------------------------------------------------------------------------------|---------------------------------------|-----------------------|---------------------|---------|
|                                                                                              | ≤10 years<br>(N=41)                   | 11-20 years<br>(N=23) | >20 years<br>(N=39) |         |
| I am open to using telemedicine routinely in the future for consultations                    |                                       |                       |                     | 0.28    |
| Strongly disagree                                                                            | 3 (7.3%)                              | 2 (8.7%)              | 5 (12.8%)           |         |
| Somewhat disagree                                                                            | 8 (19.5%)                             | 3 (13.0%)             | 6 (15.4%)           |         |
| Neither agree not disagree                                                                   | 2 (4.9%)                              | 1 (4.3%)              | 3 (7.7%)            |         |
| Somewhat agree                                                                               | 10 (24.4%)                            | 5 (21.7%)             | 12 (30.8%)          |         |
| Strongly agree                                                                               | 18 (43.9%)                            | 12 (52.2%)            | 13 (33.3%)          |         |
| I am open to using telemedicine routinely in the future for return visits                    |                                       |                       |                     | 0.19    |
| Strongly disagree                                                                            | 0 (0.0%)                              | 1 (4.3%)              | 1 (2.6%)            |         |
| Somewhat disagree                                                                            | 2 (4.9%)                              | 0 (0.0%)              | 3 (7.7%)            |         |
| Neither agree not disagree                                                                   | 2 (4.9%)                              | 1 (4.3%)              | 2 (5.1%)            |         |
| Somewhat agree                                                                               | 6 (14.6%)                             | 7 (30.4%)             | 8 (20.5%)           |         |
| Strongly agree                                                                               | 31 (75.6%)                            | 14 (60.9%)            | 25 (64.1%)          |         |
| Assuming both are equally appropriate, I prefer to use telemedicine over face-to-face visits |                                       |                       |                     | 0.040   |
| Strongly disagree                                                                            | 3 (7.5%)                              | 4 (17.4%)             | 13 (33.3%)          |         |
| Somewhat disagree                                                                            | 8 (20.0%)                             | 3 (13.0%)             | 5 (12.8%)           |         |
| Neither agree not disagree                                                                   | 11 (27.5%)                            | 4 (17.4%)             | 8 (20.5%)           |         |
| Somewhat agree                                                                               | 12 (30.0%)                            | 5 (21.7%)             | 10 (25.6%)          |         |
| Strongly agree                                                                               | 6 (15.0%)                             | 7 (30.4%)             | 3 (7.7%)            |         |
| What role has telemedicine played in your experience of burnout                              |                                       |                       |                     | 0.69    |
| Greatly contributed to burnout                                                               | 0 (0.0%)                              | 0 (0.0%)              | 2 (5.6%)            |         |
| Contributed to burnout                                                                       | 6 (15.8%)                             | 2 (10.0%)             | 1 (2.8%)            |         |
| Neither contributed to or improved burnout                                                   | 23 (60.5%)                            | 10 (50.0%)            | 22 (61.1%)          |         |
| Alleviated burnout symptoms                                                                  | 7 (18.4%)                             | 8 (40.0%)             | 8 (22.2%)           |         |
| Greatly alleviated burnout symptoms                                                          | 2 (5.3%)                              | 0 (0.0%)              | 3 (8.3%)            |         |
| Overall, my work-life balance has been improved with telemedicine                            |                                       |                       |                     | 0.38    |
| Strongly disagree                                                                            | 2 (4.9%)                              | 1 (4.5%)              | 7 (17.9%)           |         |
| Somewhat disagree                                                                            | 5 (12.2%)                             | 3 (13.6%)             | 4 (10.3%)           |         |
| Neither agree nor disagree                                                                   | 21 (51.2%)                            | 8 (36.4%)             | 14 (35.9%)          |         |
| Somewhat agree                                                                               | 9 (22.0%)                             | 6 (27.3%)             | 9 (23.1%)           |         |
| Strongly agree                                                                               | 4 (9.8%)                              | 4 (18.2%)             | 5 (12.8%)           |         |

P-values result from Spearman's test of correlation. Years of practice following residency was displayed as a 3-level variable for ease of presentation, but was analyzed as a 5-level ordinal variable in all statistical analysis.

**Supplemental Table 4: Comparisons of survey responses according to age**

| Variable                                                                                     | Age 31-40<br>(N=32) | Age 41-50<br>(N=30) | Age > 50<br>(N=41) | P-value |
|----------------------------------------------------------------------------------------------|---------------------|---------------------|--------------------|---------|
| I am open to using telemedicine routinely in the future for consultations                    |                     |                     |                    | 0.56    |
| Strongly disagree                                                                            | 3 (9.4%)            | 2 (6.7%)            | 5 (12.2%)          |         |
| Somewhat disagree                                                                            | 5 (15.6%)           | 6 (20.0%)           | 6 (14.6%)          |         |
| Neither agree not disagree                                                                   | 2 (6.3%)            | 2 (6.7%)            | 2 (4.9%)           |         |
| Somewhat agree                                                                               | 7 (21.9%)           | 8 (26.7%)           | 12 (29.3%)         |         |
| Strongly agree                                                                               | 15 (46.9%)          | 12 (40.0%)          | 16 (39.0%)         |         |
| I am open to using telemedicine routinely in the future for return visits                    |                     |                     |                    | 0.39    |
| Strongly disagree                                                                            | 0 (0.0%)            | 0 (0.0%)            | 2 (4.9%)           |         |
| Somewhat disagree                                                                            | 1 (3.1%)            | 2 (6.7%)            | 2 (4.9%)           |         |
| Neither agree not disagree                                                                   | 1 (3.1%)            | 2 (6.7%)            | 2 (4.9%)           |         |
| Somewhat agree                                                                               | 6 (18.8%)           | 7 (23.3%)           | 8 (19.5%)          |         |
| Strongly agree                                                                               | 24 (75.0%)          | 19 (63.3%)          | 27 (65.9%)         |         |
| Assuming both are equally appropriate, I prefer to use telemedicine over face-to-face visits |                     |                     |                    | 0.048   |
| Strongly disagree                                                                            | 2 (6.3%)            | 5 (17.2%)           | 13 (31.7%)         |         |
| Somewhat disagree                                                                            | 6 (18.8%)           | 5 (17.2%)           | 5 (12.2%)          |         |
| Neither agree not disagree                                                                   | 10 (31.3%)          | 5 (17.2%)           | 8 (19.5%)          |         |
| Somewhat agree                                                                               | 8 (25.0%)           | 8 (27.6%)           | 11 (26.8%)         |         |
| Strongly agree                                                                               | 6 (18.8%)           | 6 (20.7%)           | 4 (9.8%)           |         |
| What role has telemedicine played in your experience of burnout                              |                     |                     |                    | 0.51    |
| Greatly contributed to burnout                                                               | 0 (0.0%)            | 0 (0.0%)            | 2 (5.3%)           |         |
| Contributed to burnout                                                                       | 5 (16.7%)           | 2 (7.7%)            | 2 (5.3%)           |         |
| Neither contributed to or improved burnout                                                   | 17 (56.7%)          | 17 (65.4%)          | 21 (55.3%)         |         |
| Alleviated burnout symptoms                                                                  | 6 (20.0%)           | 7 (26.9%)           | 10 (26.3%)         |         |
| Greatly alleviated burnout symptoms                                                          | 2 (6.7%)            | 0 (0.0%)            | 3 (7.9%)           |         |
| Overall, my work-life balance has been improved with telemedicine                            |                     |                     |                    | 0.28    |
| Strongly disagree                                                                            | 1 (3.1%)            | 1 (3.4%)            | 8 (19.5%)          |         |
| Somewhat disagree                                                                            | 6 (18.8%)           | 2 (6.9%)            | 4 (9.8%)           |         |
| Neither agree nor disagree                                                                   | 14 (43.8%)          | 14 (48.3%)          | 15 (36.6%)         |         |
| Somewhat agree                                                                               | 7 (21.9%)           | 8 (27.6%)           | 9 (22.0%)          |         |
| Strongly agree                                                                               | 4 (12.5%)           | 4 (13.8%)           | 5 (12.2%)          |         |

P-values result from Spearman's test of correlation. Age was displayed as a 3-level variable for ease of presentation, but was analyzed as a 4-level ordinal variable in all statistical analysis.

**Supplemental Table 5: Comparisons of survey responses according to specialty**

| Variable                                                                                     | Specialty                       |                                        |                |              | P-value |
|----------------------------------------------------------------------------------------------|---------------------------------|----------------------------------------|----------------|--------------|---------|
|                                                                                              | Internal/Family Medicine (N=23) | Internal Medicinal Subspecialty (N=42) | Surgery (N=18) | Other (N=20) |         |
| I am open to using telemedicine routinely in the future for consultations                    |                                 |                                        |                |              | 0.14    |
| Strongly disagree                                                                            | 1 (4.3%)                        | 2 (4.8%)                               | 1 (5.6%)       | 6 (30.0%)    |         |
| Somewhat disagree                                                                            | 0 (0.0%)                        | 8 (19.0%)                              | 7 (38.9%)      | 2 (10.0%)    |         |
| Neither agree not disagree                                                                   | 3 (13.0%)                       | 2 (4.8%)                               | 0 (0.0%)       | 1 (5.0%)     |         |
| Somewhat agree                                                                               | 7 (30.4%)                       | 13 (31.0%)                             | 2 (11.1%)      | 5 (25.0%)    |         |
| Strongly agree                                                                               | 12 (52.2%)                      | 17 (40.5%)                             | 8 (44.4%)      | 6 (30.0%)    |         |
| I am open to using telemedicine routinely in the future for return visits                    |                                 |                                        |                |              | 0.058   |
| Strongly disagree                                                                            | 0 (0.0%)                        | 1 (2.4%)                               | 1 (5.6%)       | 0 (0.0%)     |         |
| Somewhat disagree                                                                            | 0 (0.0%)                        | 2 (4.8%)                               | 1 (5.6%)       | 2 (10.0%)    |         |
| Neither agree not disagree                                                                   | 0 (0.0%)                        | 3 (7.1%)                               | 2 (11.1%)      | 0 (0.0%)     |         |
| Somewhat agree                                                                               | 3 (13.0%)                       | 9 (21.4%)                              | 5 (27.8%)      | 4 (20.0%)    |         |
| Strongly agree                                                                               | 20 (87.0%)                      | 27 (64.3%)                             | 9 (50.0%)      | 14 (70.0%)   |         |
| Assuming both are equally appropriate, I prefer to use telemedicine over face-to-face visits |                                 |                                        |                |              | 0.001   |
| Strongly disagree                                                                            | 0 (0.0%)                        | 8 (19.5%)                              | 7 (38.9%)      | 5 (25.0%)    |         |
| Somewhat disagree                                                                            | 2 (8.7%)                        | 6 (14.6%)                              | 5 (27.8%)      | 3 (15.0%)    |         |
| Neither agree not disagree                                                                   | 5 (21.7%)                       | 11 (26.8%)                             | 1 (5.6%)       | 6 (30.0%)    |         |
| Somewhat agree                                                                               | 8 (34.8%)                       | 10 (24.4%)                             | 4 (22.2%)      | 5 (25.0%)    |         |
| Strongly agree                                                                               | 8 (34.8%)                       | 6 (14.6%)                              | 1 (5.6%)       | 1 (5.0%)     |         |
| What role has telemedicine played in your experience of burnout                              |                                 |                                        |                |              | 0.006   |
| Greatly contributed to burnout                                                               | 0 (0.0%)                        | 0 (0.0%)                               | 1 (6.3%)       | 1 (5.3%)     |         |
| Contributed to burnout                                                                       | 0 (0.0%)                        | 4 (10.8%)                              | 4 (25.0%)      | 1 (5.3%)     |         |
| Neither contributed to or improved burnout                                                   | 11 (50.0%)                      | 23 (62.2%)                             | 10 (62.5%)     | 11 (57.9%)   |         |
| Alleviated burnout symptoms                                                                  | 9 (40.9%)                       | 9 (24.3%)                              | 0 (0.0%)       | 5 (26.3%)    |         |
| Greatly alleviated burnout symptoms                                                          | 2 (9.1%)                        | 1 (2.7%)                               | 1 (6.3%)       | 1 (5.3%)     |         |

Overall, my work-life balance has been improved with telemedicine

<0.001

|                            |           |            |           |           |
|----------------------------|-----------|------------|-----------|-----------|
| Strongly disagree          | 0 (0.0%)  | 2 (4.9%)   | 4 (22.2%) | 4 (20.0%) |
| Somewhat disagree          | 1 (4.3%)  | 4 (9.8%)   | 4 (22.2%) | 3 (15.0%) |
| Neither agree nor disagree | 7 (30.4%) | 22 (53.7%) | 9 (50.0%) | 5 (25.0%) |
| Somewhat agree             | 9 (39.1%) | 9 (22.0%)  | 0 (0.0%)  | 6 (30.0%) |
| Strongly agree             | 6 (26.1%) | 4 (9.8%)   | 1 (5.6%)  | 2 (10.0%) |

---

P-values result from a Kruskal-Wallis rank sum test.

---
